# Supplementary figures and images for: Photoprocessing of cationic triazacoronene: dissociation characteristics of polycyclic aromatic nitrogen heterocycles in interstellar environments
Source: Royal Society of Chemistry journal article supplement (doi:10.1039/d4cp01387e), 2024-01-01

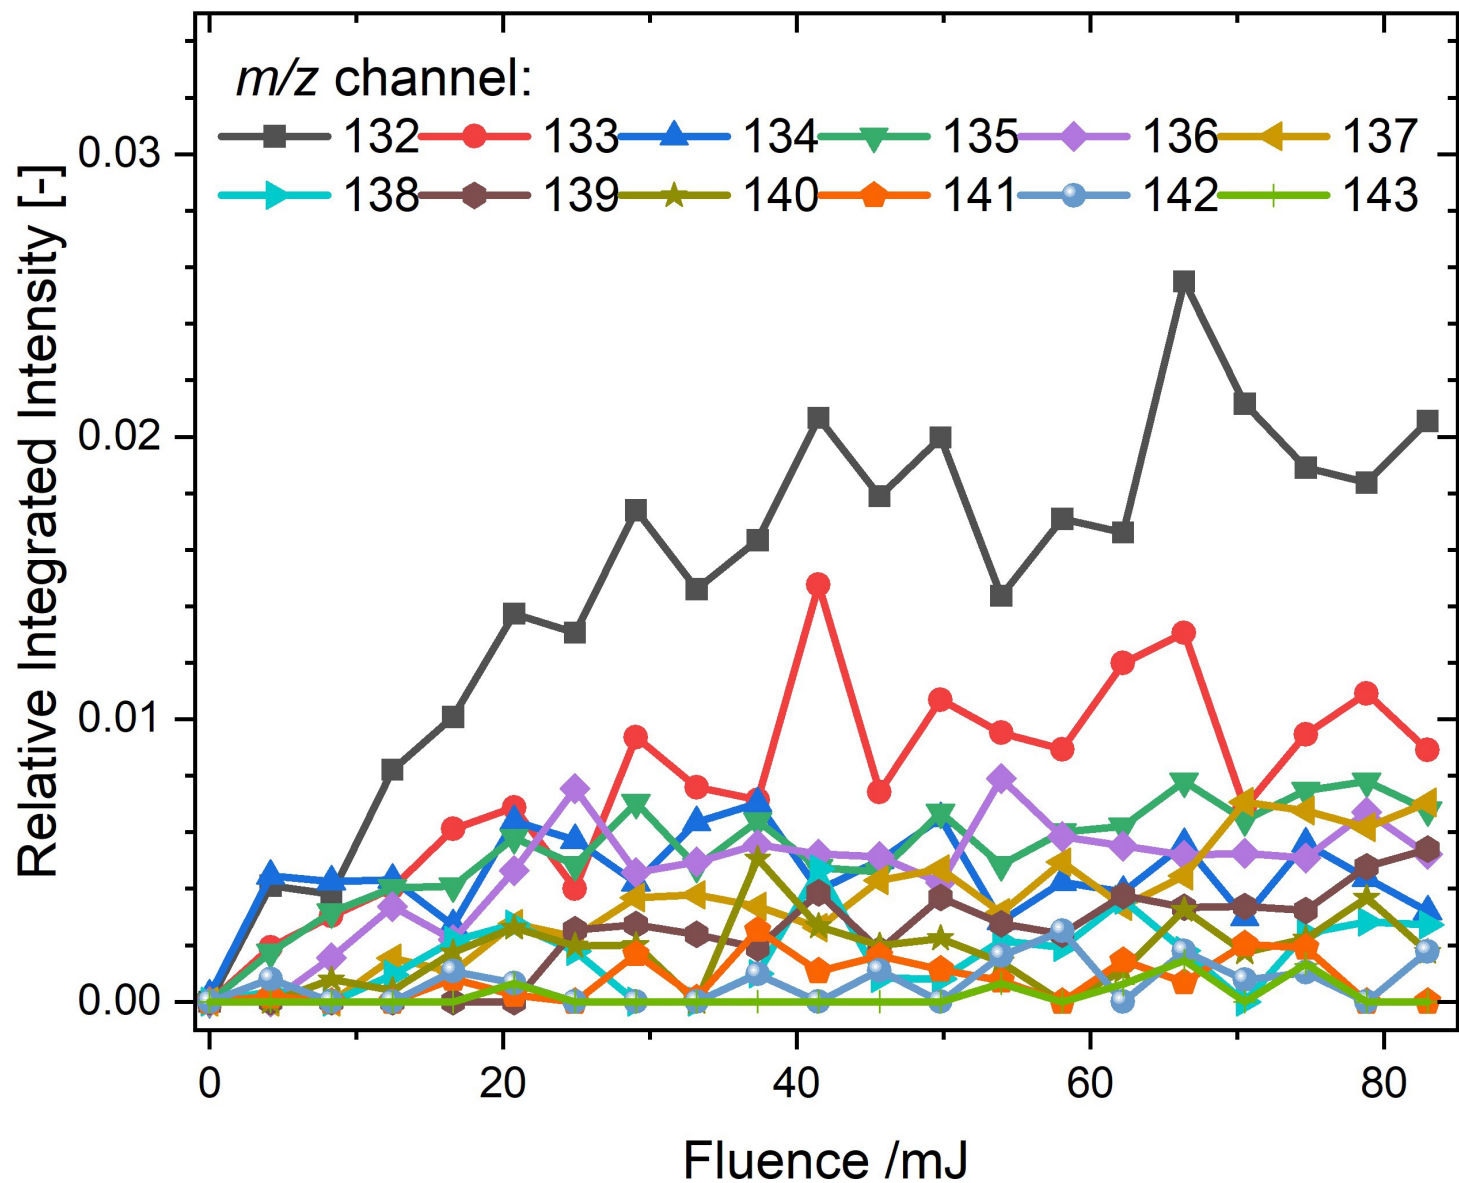

Supplement: d4cp01387e10.pdf [file d4cp01387e10.pdf]

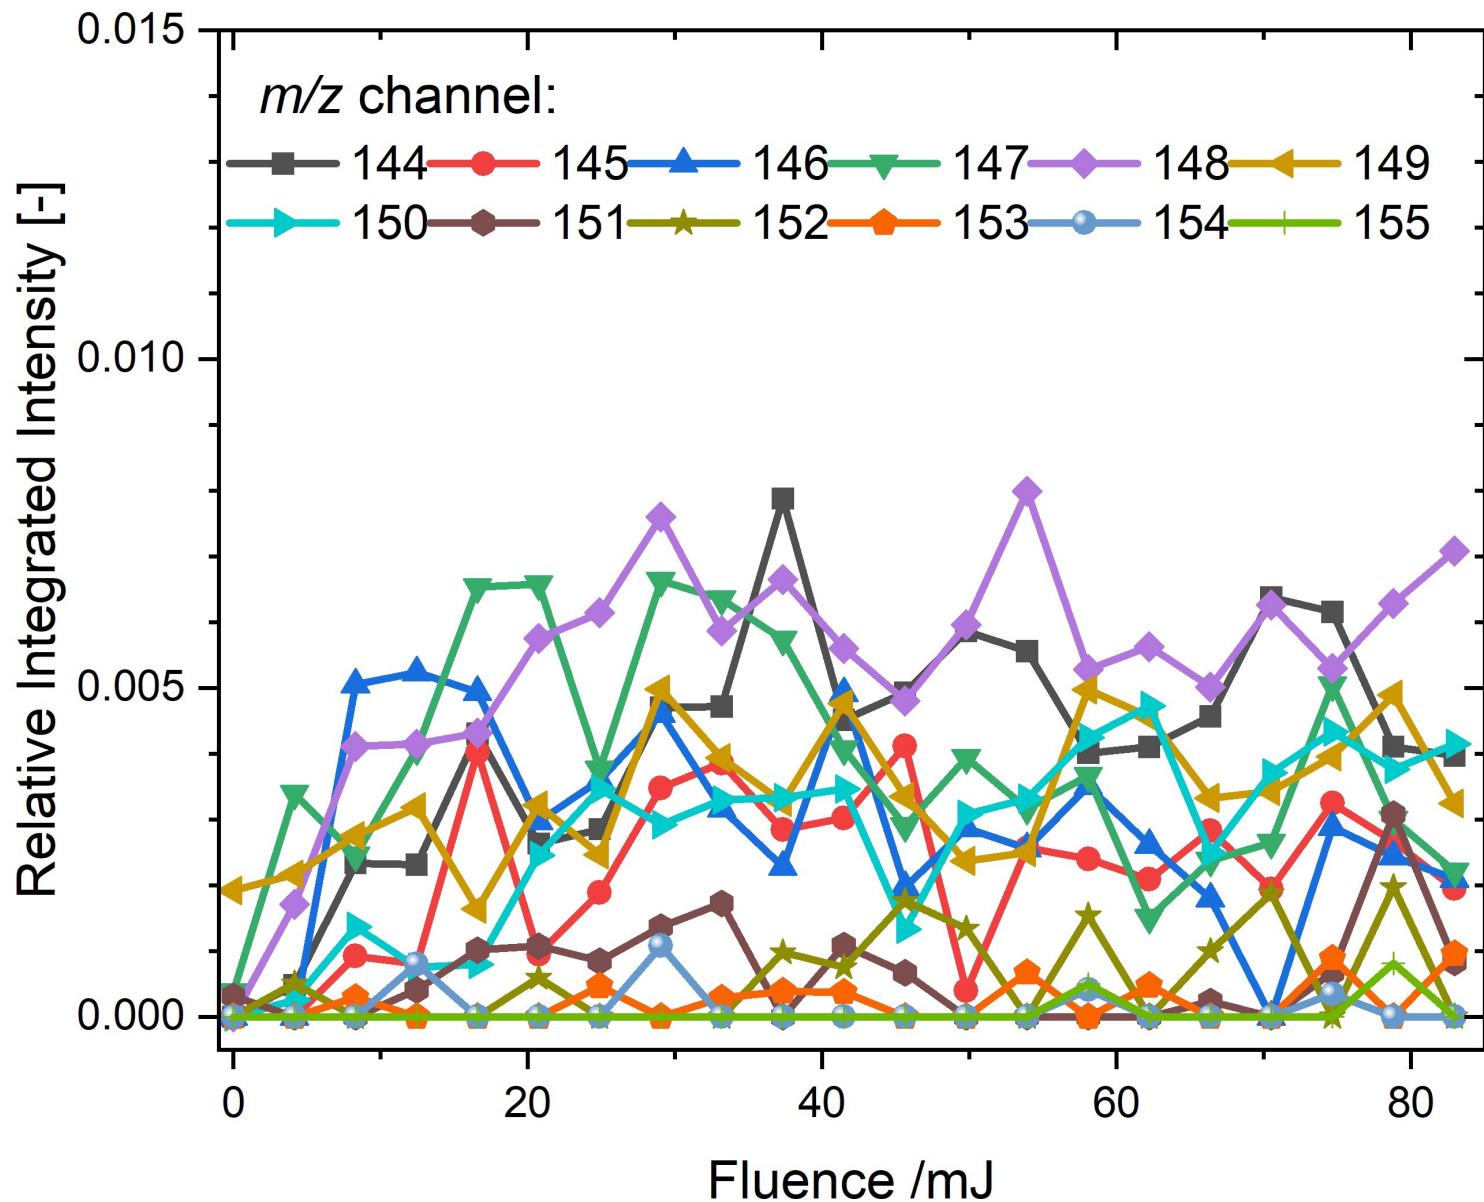

Supplement: d4cp01387e11.pdf [file d4cp01387e11.pdf]

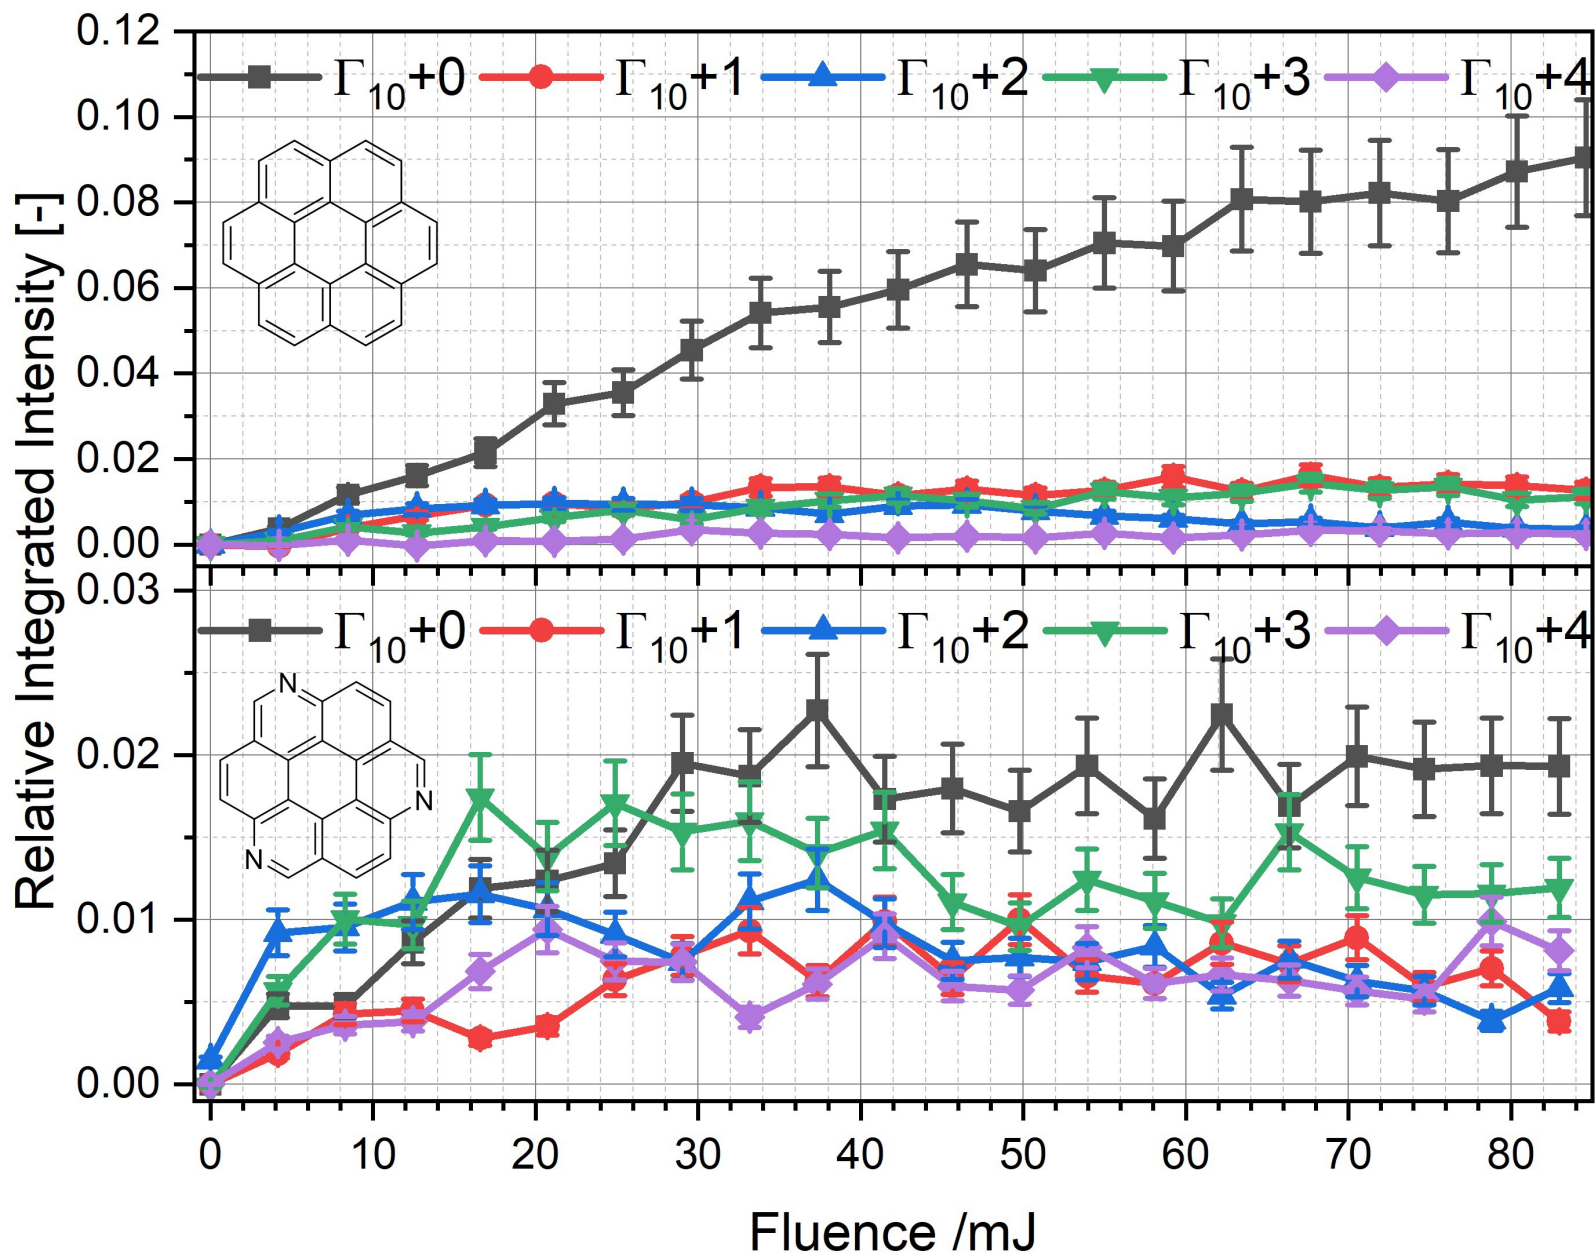

Supplement: d4cp01387e12.pdf [file d4cp01387e12.pdf]

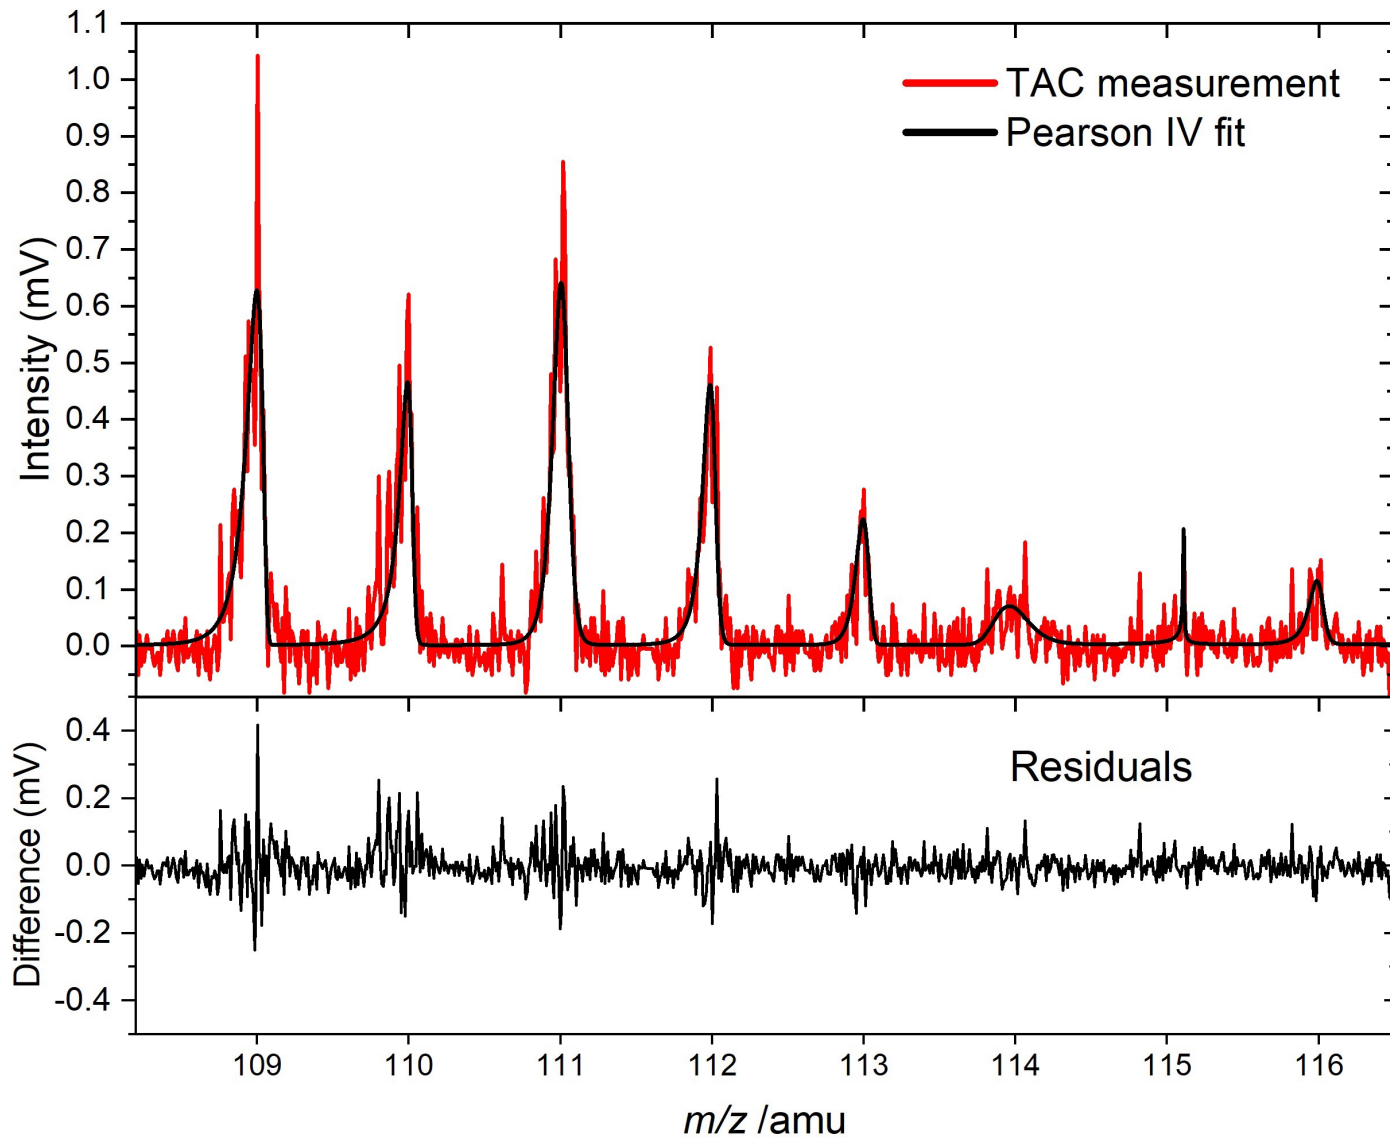

Supplement: d4cp01387e2.pdf [file d4cp01387e2.pdf]

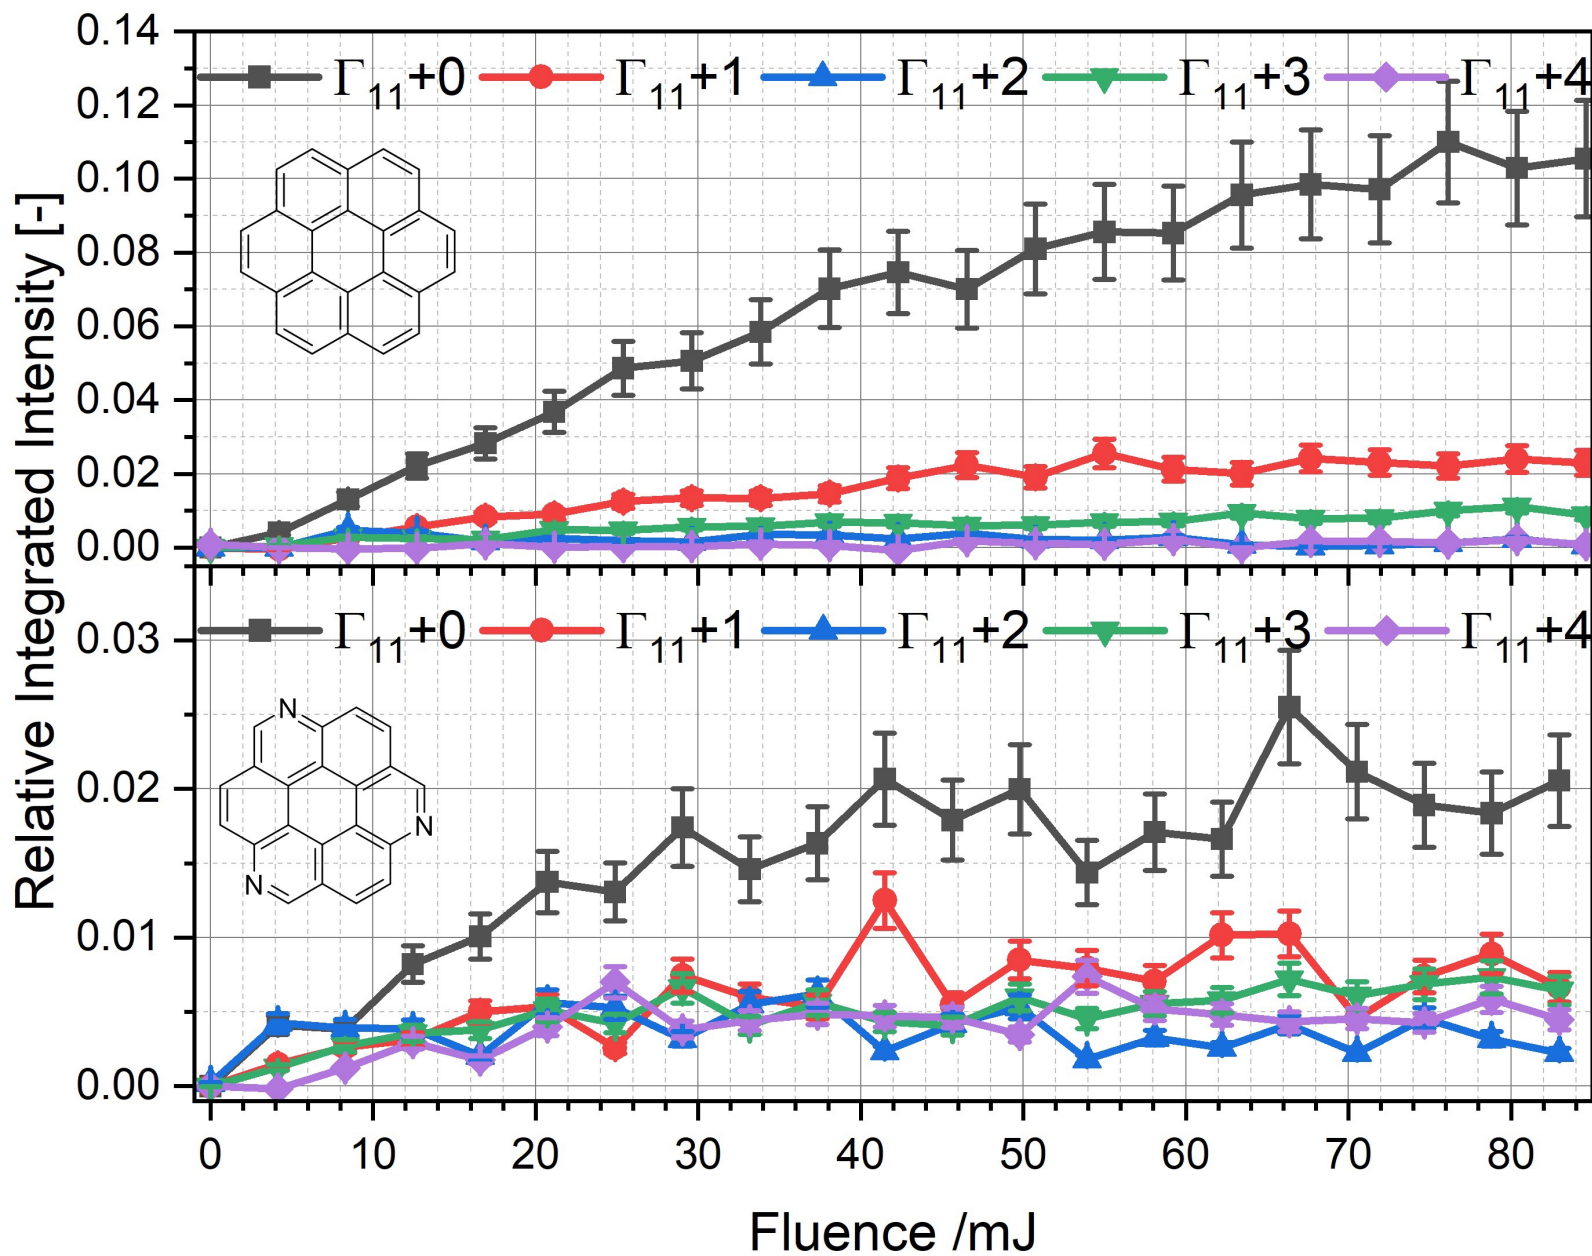

Supplement: d4cp01387e3.pdf [file d4cp01387e3.pdf]

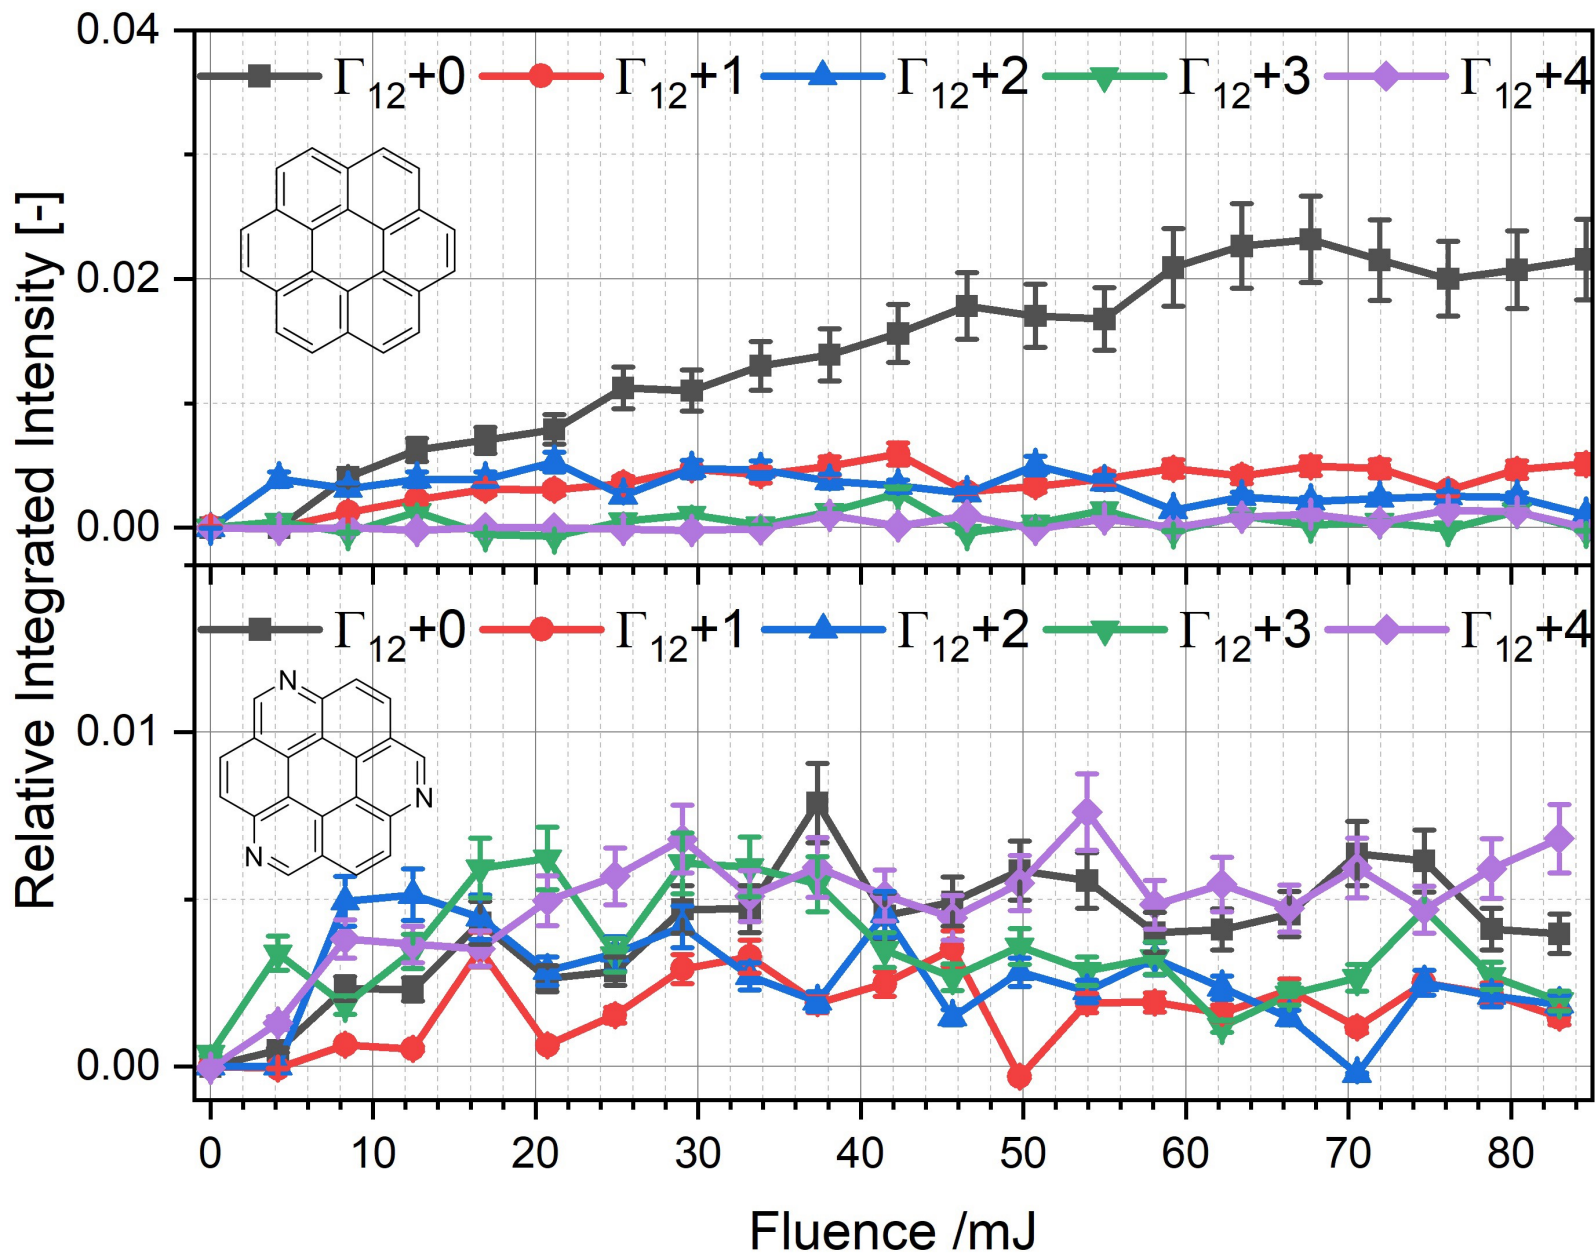

Supplement: d4cp01387e4.pdf [file d4cp01387e4.pdf]

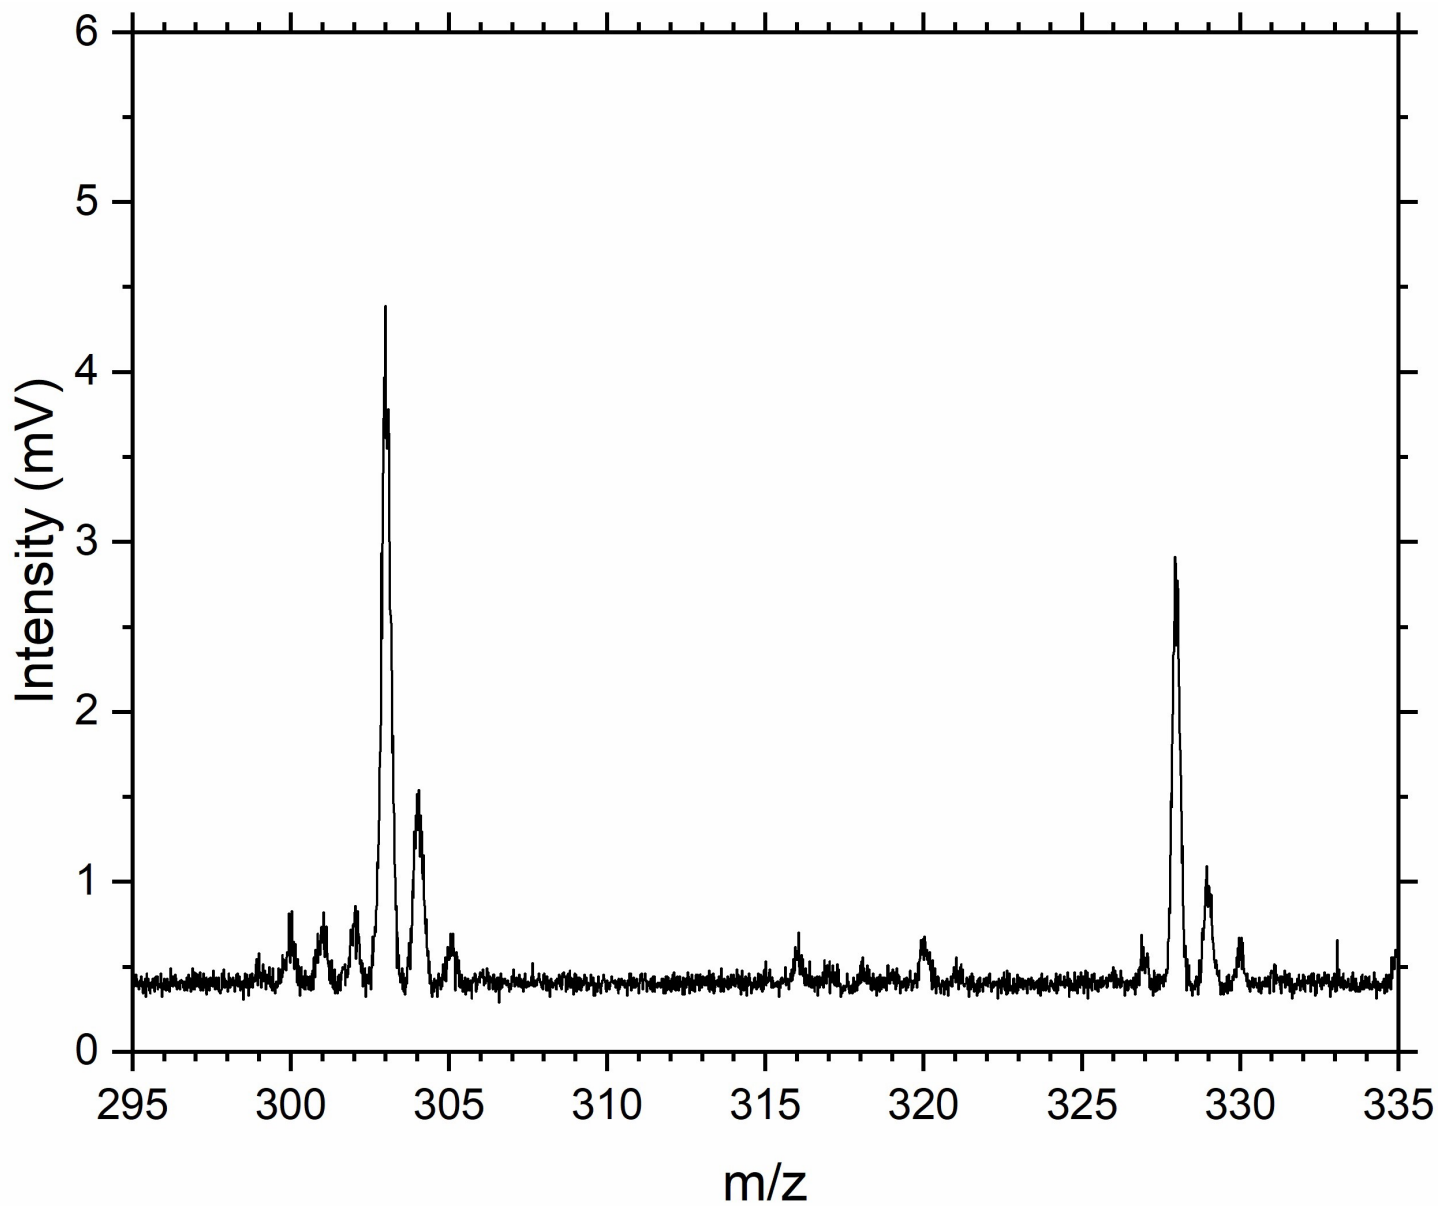

Supplement: d4cp01387e5.pdf [file d4cp01387e5.pdf]

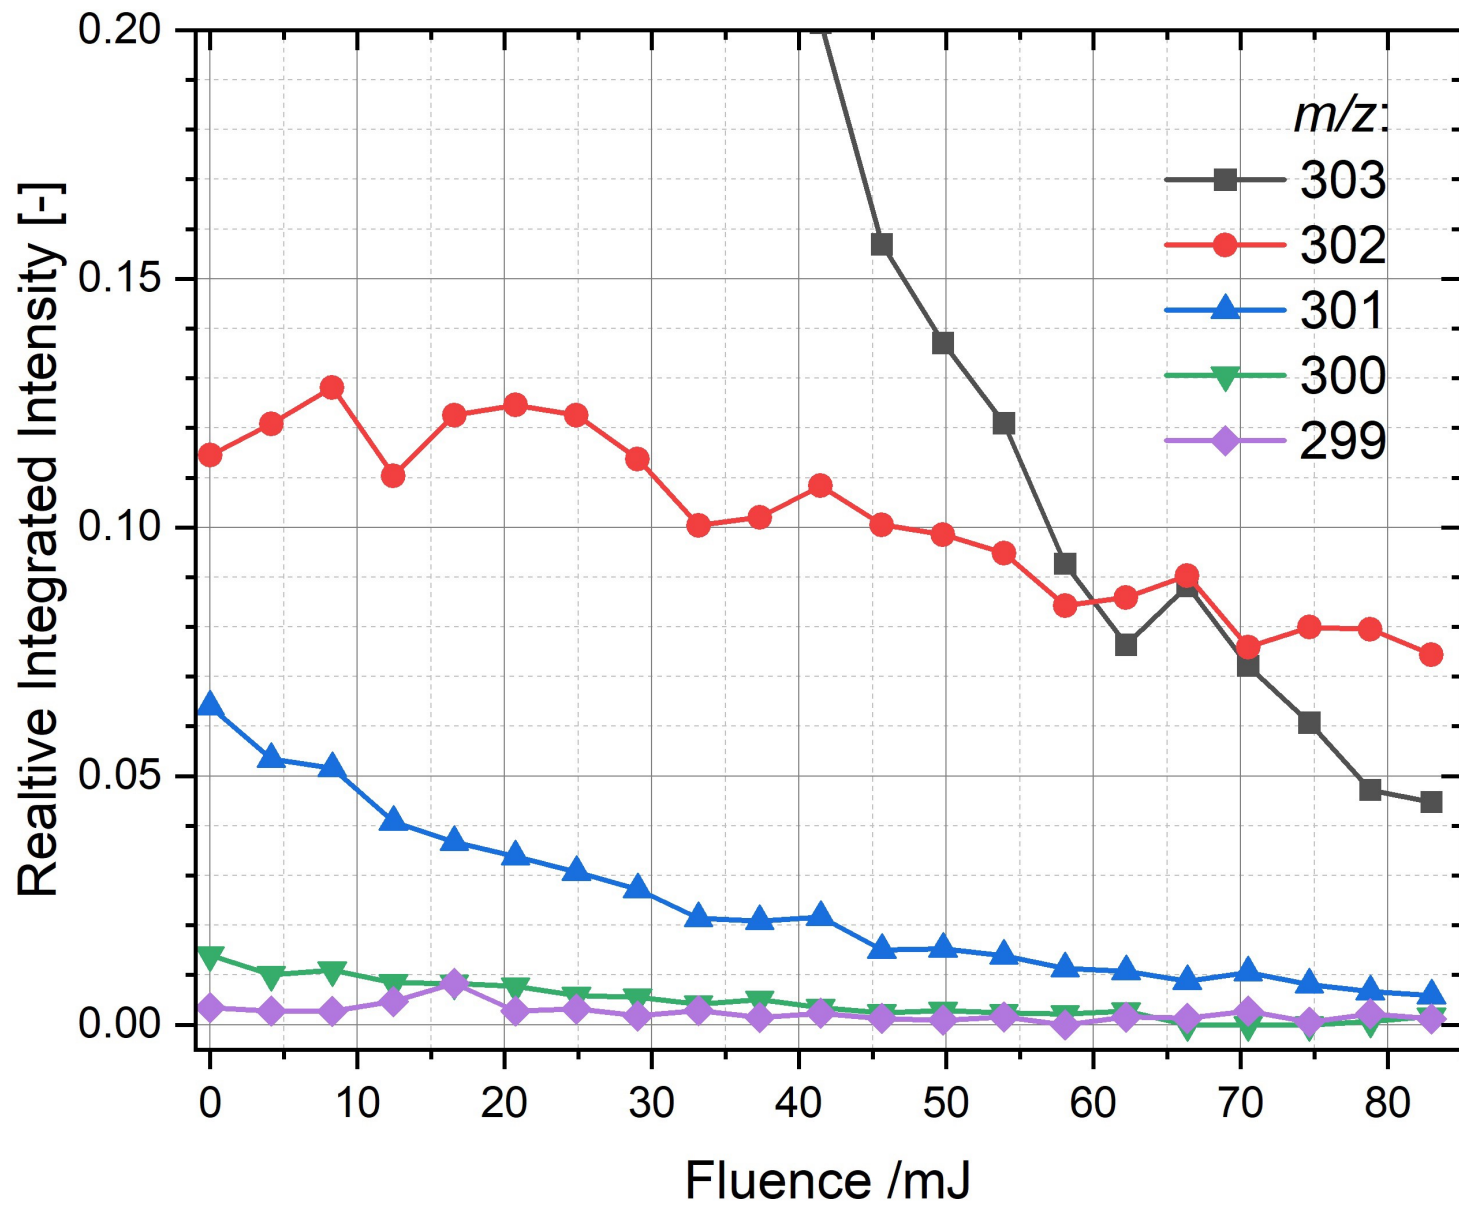

Supplement: d4cp01387e6.pdf [file d4cp01387e6.pdf]

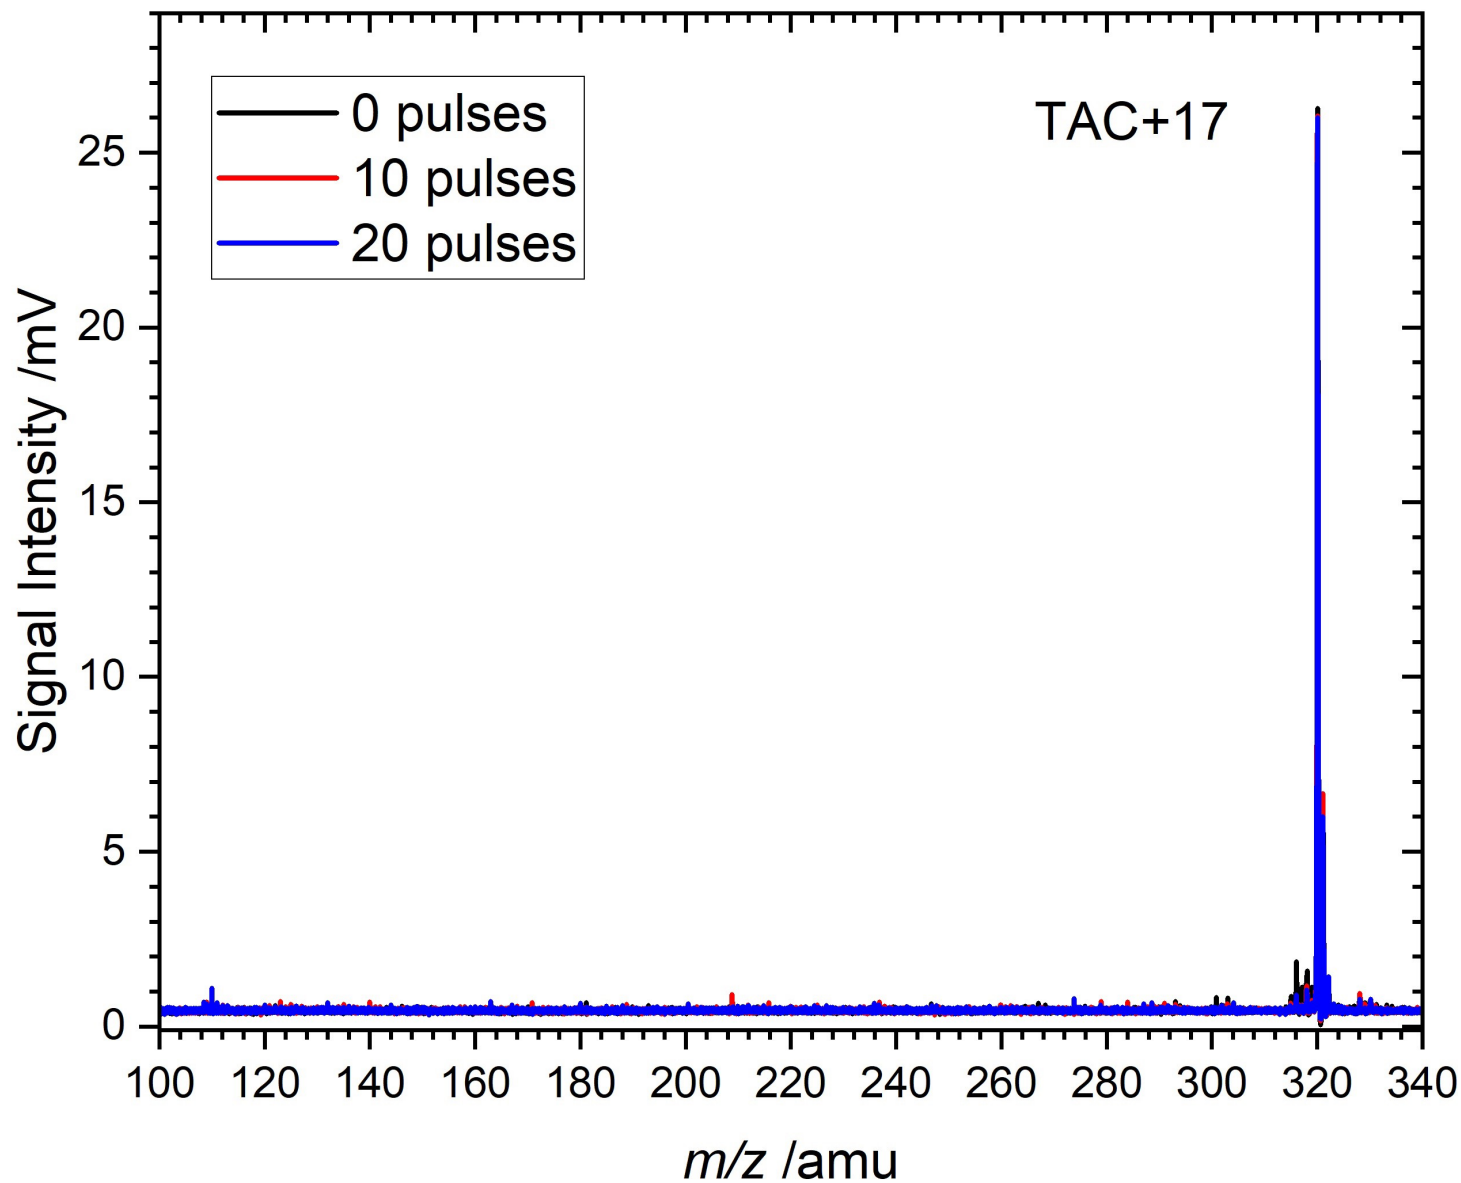

Supplement: d4cp01387e7.pdf [file d4cp01387e7.pdf]

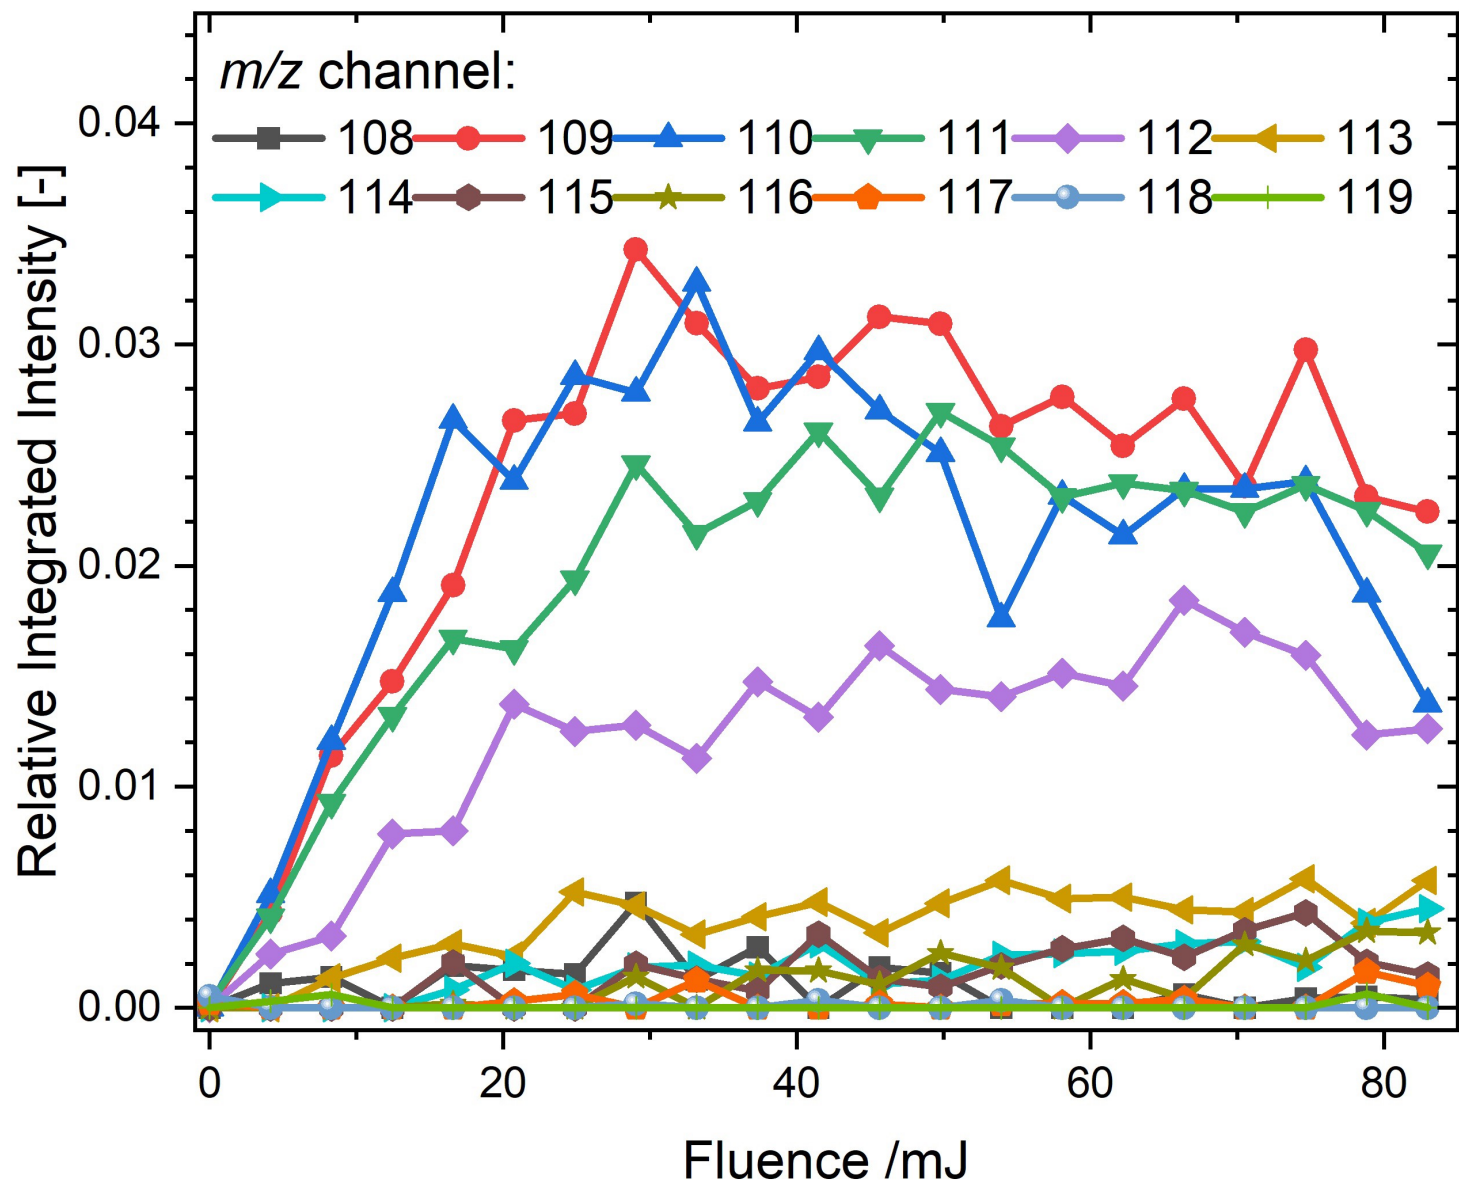

Supplement: d4cp01387e8.pdf [file d4cp01387e8.pdf]

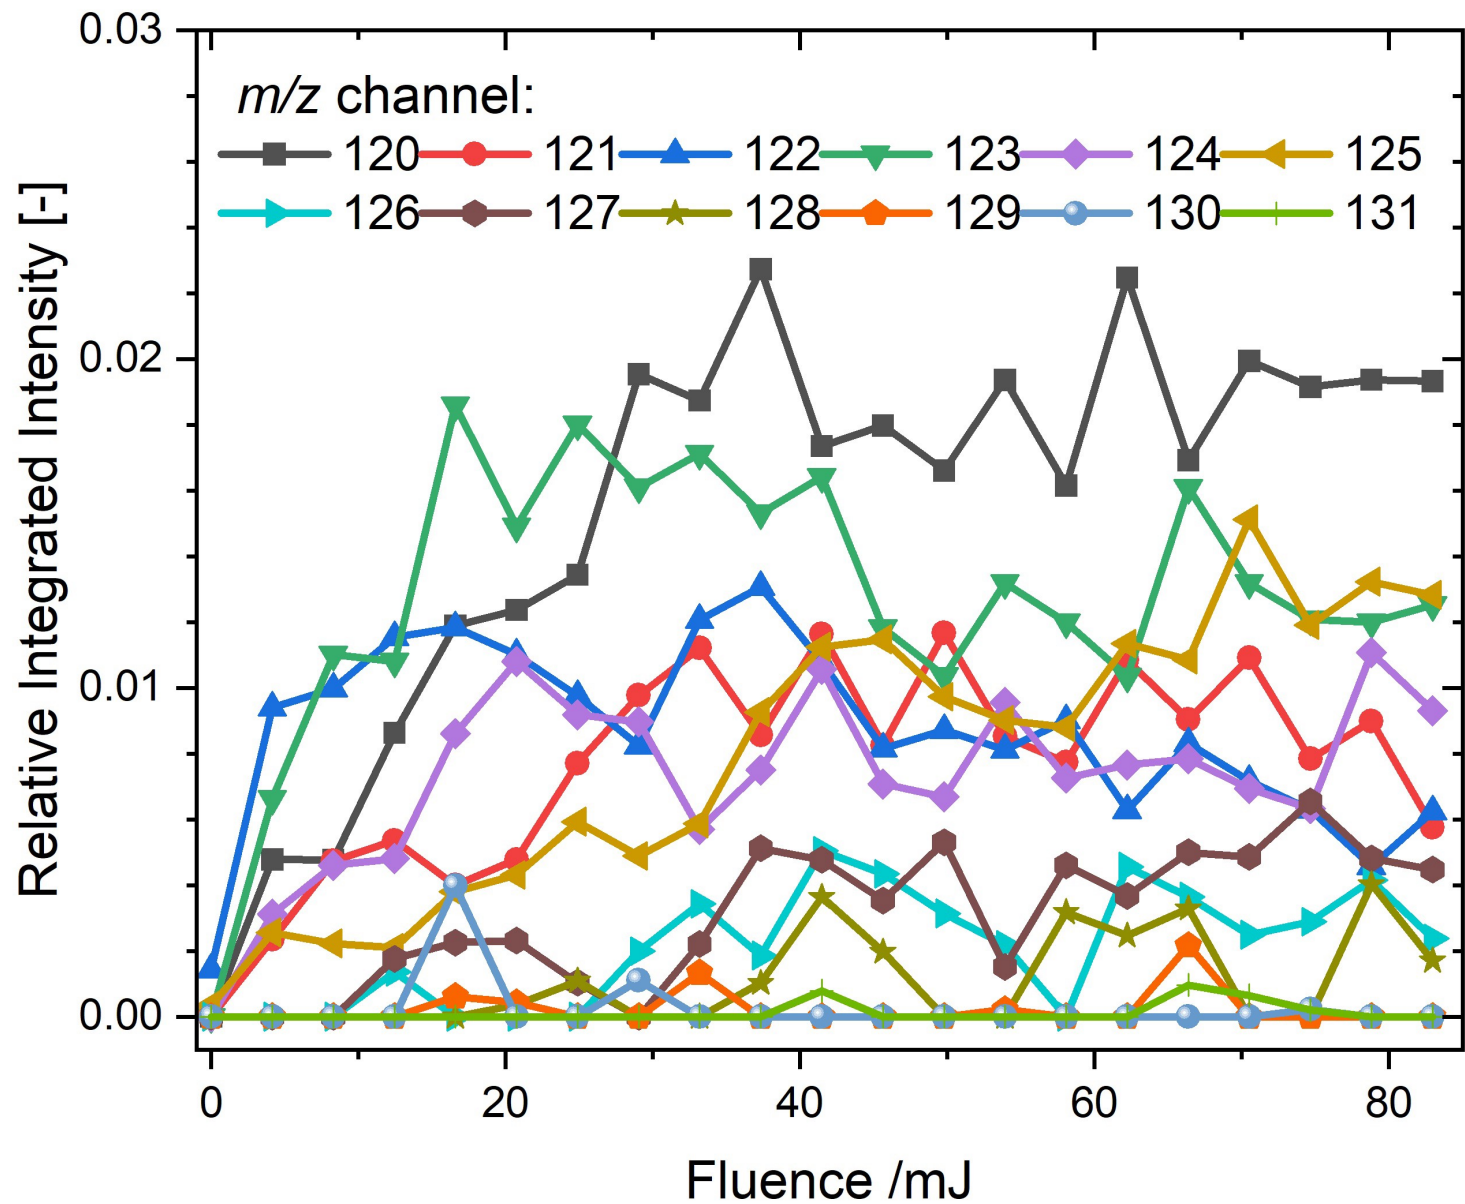

Supplement: d4cp01387e9.pdf [file d4cp01387e9.pdf]
